# Supplementary material
Source: Springer Nature journal article supplement (https://www.springermedizin.de/resource/supplementary/12958_2008_453_MOESM1_ESM.pdf/9567924)
Supplement: MOESM1 [file 9567924]

# Figure 1: Cryopreservation and transplantation of ovarian tissues

## *Advantages*

Immediate harvesting (can start treatment without delay)

No male partner/gamete donor needed

Allow for complete gonadotoxic and or ionizing radiation treatment without exposure

Resume endocrine function

Resume and preserve reproductive function

Suitable for prepubertal girls

## *Disadvantages*

Requires surgical procedures for tissue harvesting and transfer

Possibility of reintroducing malignant cells

Low success rate
